# Supplementary material for: Magnetic hydroxyapatite nanoworms for magnetic resonance diagnosis of acute hepatic injury
Source: Royal Society of Chemistry journal article supplement (doi:10.1039/c5nr07023f), 2015-12-09
Supplement: c5nr07023f1.pdf [file c5nr07023f1.pdf]

Electronic Supplementary Information for:

## Magnetic hydroxyapatite nanoworms for magnetic resonance diagnosis of acute hepatic injury

Yun-Jun Xu<sup>a,b</sup>, Liang Dong<sup>a</sup>, Yang Lu<sup>a,c</sup>, Le-Cheng Zhang<sup>a</sup>, Duo An<sup>a</sup>, Huai-Ling Gao<sup>a</sup>, Dong-Mei Yang<sup>b</sup>, Wen Hu<sup>b</sup>, Cong Sui<sup>a</sup>, Wei-Ping Xu<sup>b,\*</sup> and Shu-Hong Yu<sup>a,\*</sup>

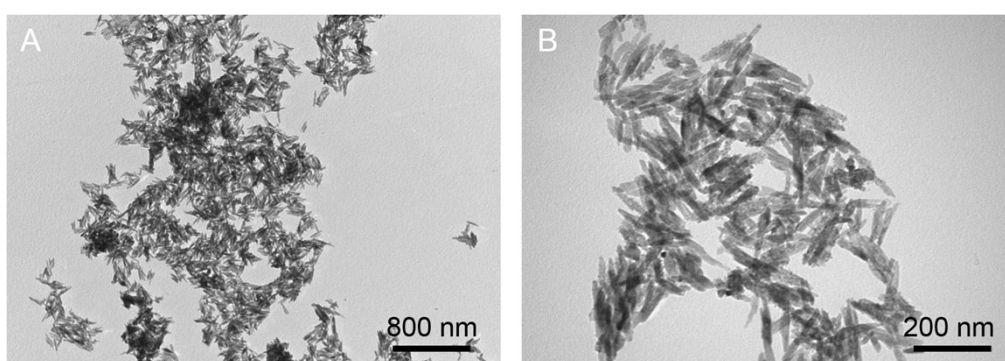

Figure S1. TEM of HAP-ION nanocomposites.

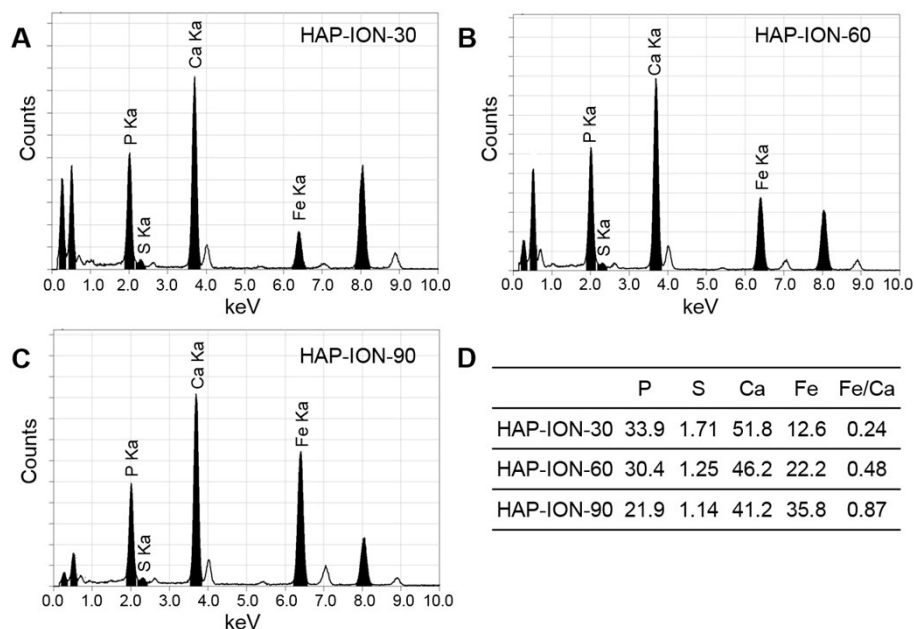

Figure S2. EDX of HAP-ION nanoworms coated with CH/SA multilayers. (A) HAP-ION-30, (B) HAP-ION-60, (C) HAP-ION-90. (D) The content of different elements in the HAP-ION nanoworms and the calculated ratio of Fe to Ca according to the EDX results in (A-C).
